# Supplementary material for: Discovery of Gongshan muntjac (Muntiacus gongshanensis) in Arunachal Pradesh: overlapping distribution with Muntiacus vaginalis and taxonomic insights
Source: Research Square preprint supplement (doi:10.21203/rs.3.rs-8439843/v1), 2026-01-27
Supplement: Supplementary file 1 [file 66dff976bf43f067a55447b9.docx]

[Supplementary Figure S 1: Maximum-likelihood phylogenetic tree reconstructed based on the mitochondrial gene using MEGA X. a) based on Cytochrome b gene, and (b) based on 12S rRNA. Samples from the study were marked with red boxes while green dots represent the misidentified sequences of M. gongsiansis submitted to GenBank. 2](#_Toc191049192)

[Supplementary Figure S 2: Neighbor-joining (NJ) phylogenetic tree reconstructed with MEGA X based on the mitochondrial gene. 1(a) based on Cytochrome b gene, and 1(b) based on 12S rRNA. Samples from the current study are in MT ID. 3](#_Toc191049193)

Supplementary Table S 1: List of complete dataset of the sequences of Muntjac, with Accession number and geographic origin used in the study…………………………………………………………………………………………………………………………..……..4


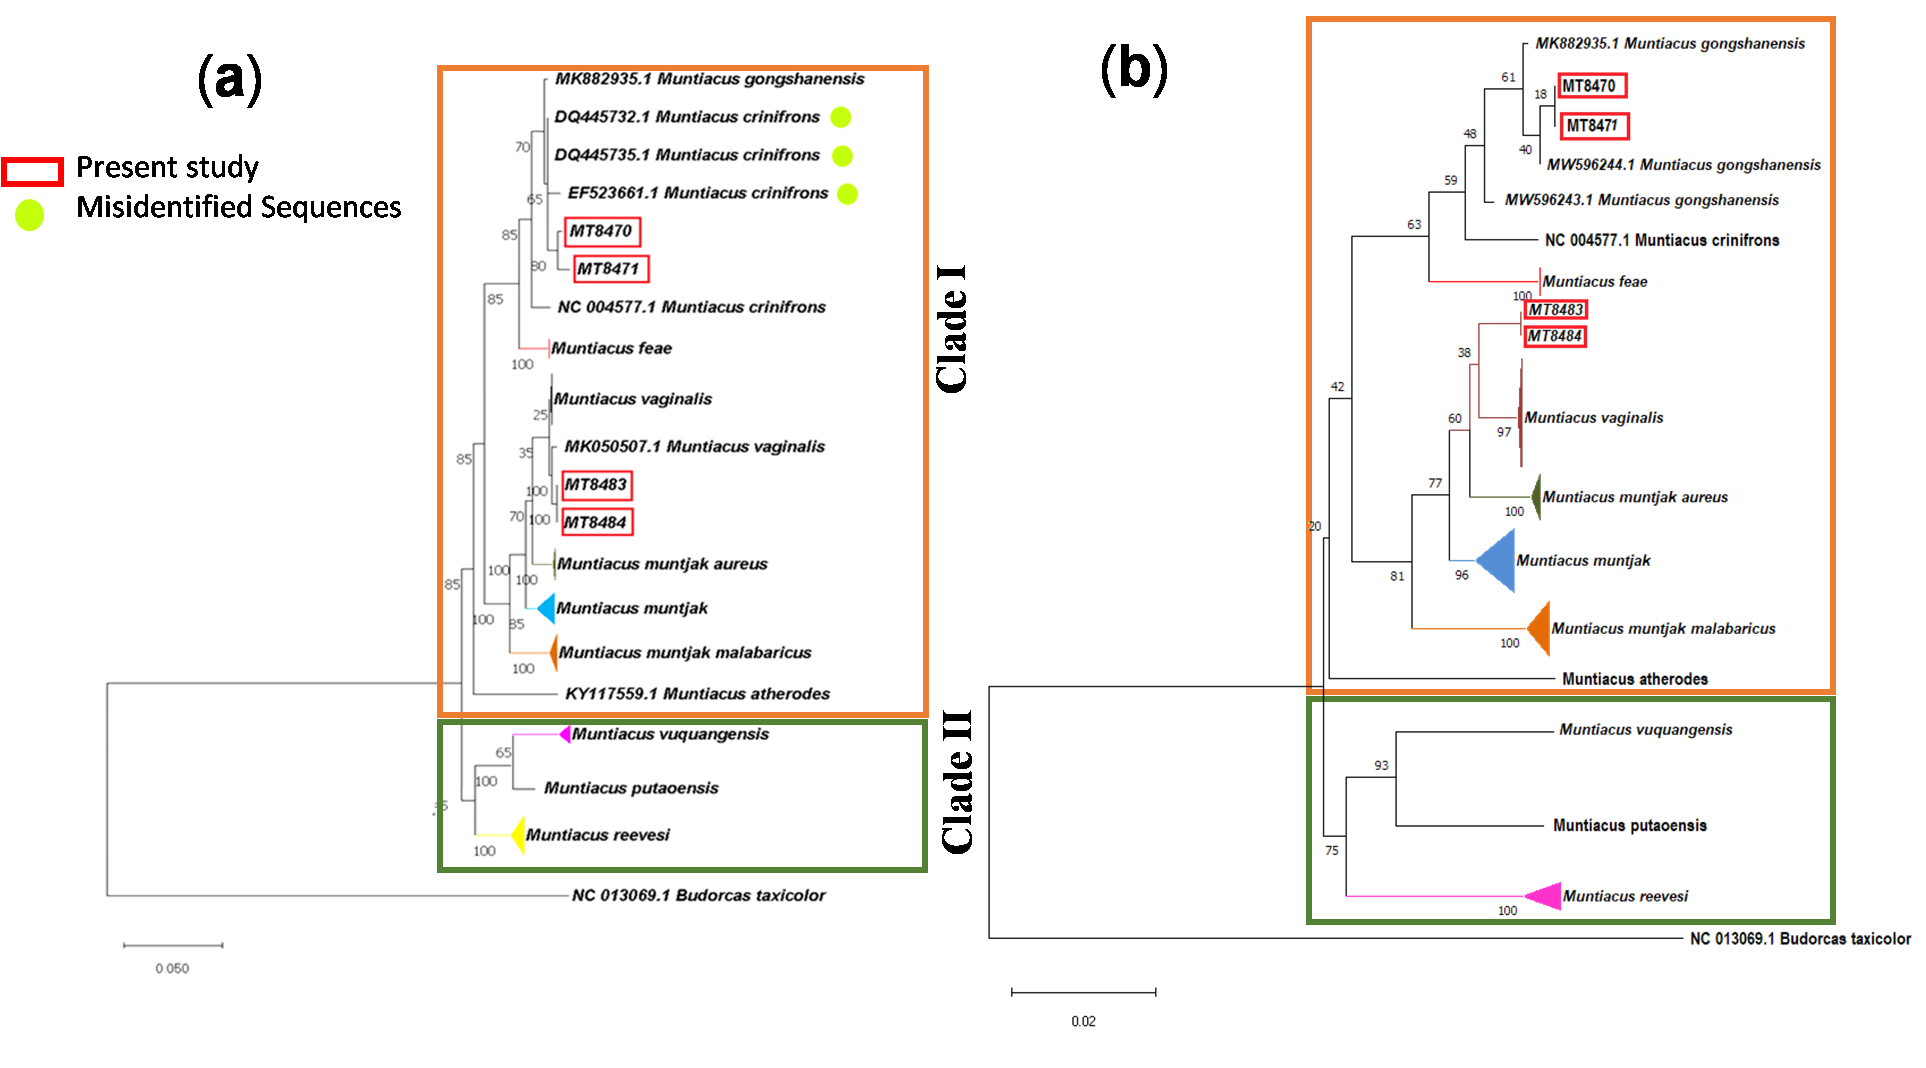


Supplementary Figure S 1: Maximum-likelihood phylogenetic tree reconstructed based on the mitochondrial gene using MEGA X. a) based on Cytochrome b gene, and (b) based on 12S rRNA. Samples from the study were marked with red boxes while green dots represent the misidentified sequences of M. gongsiansis submitted to GenBank.


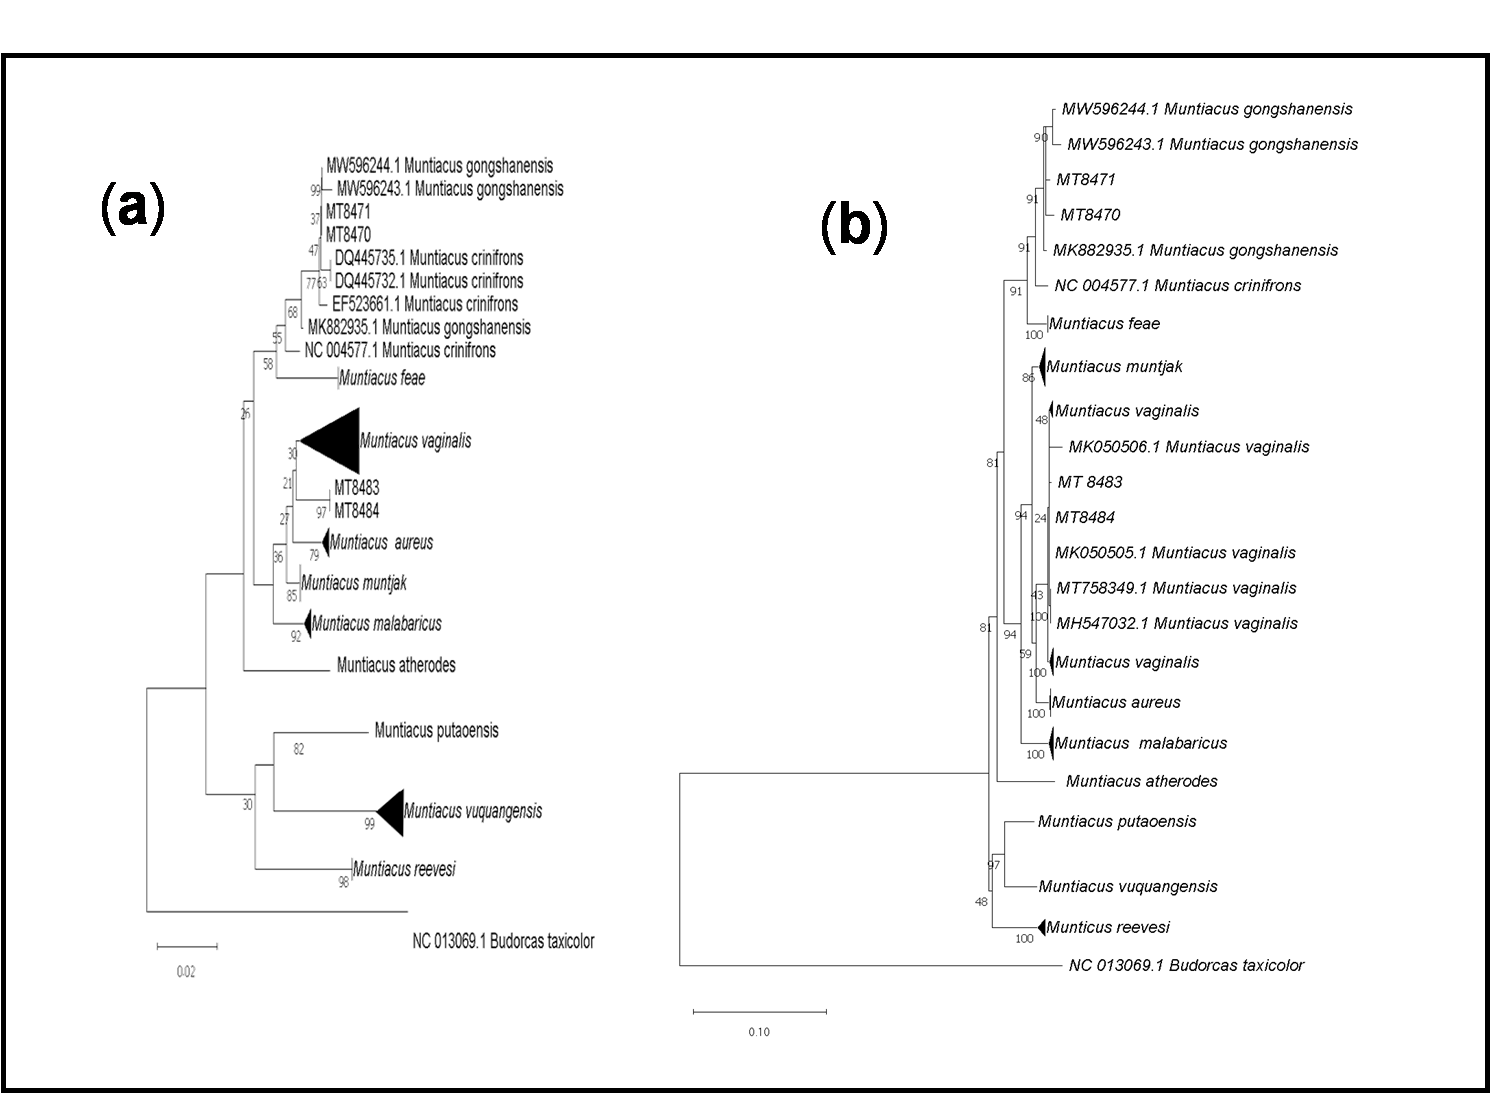


Supplementary Figure S 2: Neighbor-joining (NJ) phylogenetic tree reconstructed with MEGA X based on the mitochondrial gene. 1(a) based on Cytochrome b gene, and 1(b) based on 12S rRNA. Samples from the current study are in MT ID.

Supplementary Table S 1: List of complete dataset of the sequences of Muntjac, with Accession number and geographic origin used in the study.

| **S. No.** | **Accession No.** | **Location** | **Citations** | **Species** | **Gene** |
| --- | --- | --- | --- | --- | --- |
| 1 | MK882935 | China | Unpublish | *Muntiacus gongshanensis* | *Cytb, 12S rRNA* |
| 2 | MW596243 | China | Zhang et al. 2021 | *Muntiacus gongshanensis* | *Cytb, 12S rRNA* |
| 3 | MW596244 | China | Zhang et al. 2021 | *Muntiacus gongshanensis* | *Cytb, 12S rRNA* |
| 5 | EF523661 | Namdapha, India | James et al 2007 | *Muntiacus crinifrons* | *Cytb* |
| 6 | NC 004577 | China | Li et al 2017 | *Muntiacus crinifrons* | *Cytb, 12S rRNA* |
| 7 | DQ445732 | China | Chen et al 2008 | *Muntiacus crinifrons* | *Cytb* |
| 8 | DQ445735 | China | Chen et al 2008 | *Muntiacus crinifrons* | *Cytb* |
| 9 | MG857663 | Thailand | Srisodsuk et al 2018 | *Muntiacus feae* | *Cytb, 12S rRNA* |
| 10 | NC 041100 | Thailand | Srisodsuk et al 2019 | *Muntiacus feae* | *Cytb, 12S rRNA* |
| 11 | MH547032 | Northeast India | Singh et al 2018 | *Muntiacus vaginalis* | *Cytb* |
| 12 | MT758349 | Chhattisgarh, India | Singh et al 2021 | *Muntiacus vaginalis* | *Cytb, 12S rRNA* |
| 13 | MT758350 | Chhattisgarh, India | Singh et al 2021 | *Muntiacus vaginalis* | *Cytb, 12S rRNA* |
| 14 | MK050505 | Northeast India | Singh et al 2021 | *Muntiacus vaginalis* | *Cytb, 12S rRNA* |
| 15 | MK050506 | Northeast India | Singh et al 2021 | *Muntiacus vaginalis* | *Cytb, 12S rRNA* |
| 16 | MK050507 | Northeast India | Singh et al 2021 | *Muntiacus vaginalis* | *Cytb, 12S rRNA* |
| 17 | MT671399 | Andaman, India | Singh et al 2021 | *Muntiacus vaginalis* | *Cytb, 12S rRNA* |
| 18 | AY225986 | China | Shi et al 2003 | *Muntiacus muntjak* | *Cytb* |
| 19 | KY117560 | Southeast asia | Mohd Salleh et al 2017 | *Muntiacus muntjak* | *Cytb* |
| 20 | MT671400 | Himachal Pradesh, India | Singh et al 2021 | *Muntiacus aureus* | *Cytb, 12S rRNA* |
| 21 | MT671404 | Uttarakhand, India | Singh et al 2021 | *Muntiacus aureus* | *Cytb, 12S rRNA* |
| 22 | MT671405 | Karnataka, India | Singh et al 2021 | *Muntiacus malabaricus* | *Cytb, 12S rRNA* |
| 23 | MT671405 | Karnataka, India | Singh et al 2021 | *Muntiacus malabaricus* | *Cytb, 12S rRNA* |
| 24 | MT671406 | Karnataka, India | Singh et al 2021 | *Muntiacus malabaricus* | *Cytb, 12S rRNA* |
| 25 | MT671407 | Western Ghats, India | Singh et al 2021 | *Muntiacus malabaricus* | *Cytb, 12S rRNA* |
| 26 | MT671408 | Western Ghats, India | Singh et al 2021 | *Muntiacus malabaricus* | *Cytb, 12S rRNA* |
| 27 | KY117559 | Southeast Asia | Mohd Salleh et al 2017 | *Muntiacus atherodes* | *Cytb, 12S rRNA* |
| 28 | NC 036430 | China | Li et al 2017 | *Muntiacus putaoensis* | *Cytb, 12S rRNA* |
| 29 | NC 016920 | India | Hassanin et al 2012 | *Muntiacus vuquangensis* | *Cytb, 12S rRNA* |
| 30 | KJ425275 | Unknown | Malik et al 2014 | *Muntiacus vuquangensis* | *Cytb* |
| 31 | KJ425283 | Unknown | Malik et al 2014 | *Muntiacus vuquangensis* | *Cytb* |
| 32 | KJ425284 | Unknown | Malik et al 2014 | *Muntiacus vuquangensis* | *Cytb* |
| 33 | KJ425285 | Unknown | Malik et al 2014 | *Muntiacus vuquangensis* | *Cytb* |
| 34 | KY117561 | Southeast Asia | unpublished | *Muntiacus reevesi* | *Cytb, 12S rRNA* |
| 35 | PQ063858 | Dong , India | This Study | *Muntiacus vaginalis* | *Cytb* |
| 36 | PQ063859 | Dong , India | This Study | *Muntiacus vaginalis* | *Cytb* |
| 37 | PQ063856 | Dong , India | This Study | *Muntiacus gongshanensis* | *Cytb* |
| 38 | PQ063857 | Dong , India | This Study | *Muntiacus gongshanensis* | *Cytb* |
| 39 | PX512265 | Dong , India | This Study | *Muntiacus gongshanensis* | *12S rRNA* |
| 40 | PX512266 | Dong , India | This Study | *Muntiacus gongshanensis* | *12S rRNA* |
| 41 | PX512267 | Dong , India | This Study | *Muntiacus vaginalis* | *12S rRNA* |
| 42 | PX512268 | Dong , India | This Study | *Muntiacus vaginalis* | *12S rRNA* |
